# Supplementary material for: Diagnostic Process in Rare Diseases: Determinants Associated with Diagnostic Delay
Source: MDPI journal article supplement (doi:10.3390/ijerph19116456), 2022-05-26
Supplement: s1 [file s1]

**Table S1.** Table showing the complete list of included RD in the study.

| Rare Disease Name                                           | ORPHA Code |                                                                                            |             |
|-------------------------------------------------------------|------------|--------------------------------------------------------------------------------------------|-------------|
| 15q13.3 microdeletion syndrome                              | 199318     | Arnold-Chiari malformation type I/Arnold-Chiari malformation type II                       | 268882/1136 |
| 16p13.3 microduplication syndrome                           | 96078      | Arnold-Chiari malformation type II                                                         | 1136        |
| 17p11.2 microduplication syndrome                           | 1713       | Arthrogryposis multiplex congenita                                                         | 1037        |
| 1p36 deletion syndrome                                      | 1606       | ATTRV122I amyloidosis                                                                      | 85451       |
| 22q11.2 deletion syndrome                                   | 567        | Autism spectrum disorder due to AUTS2 deficiency                                           | 352490      |
| 3q29 microdeletion syndrome                                 | 65286      | Autoimmune hepatitis                                                                       | 2137        |
| 4p16.3 microduplication syndrome                            | 96072      | Autoimmune pancreatitis                                                                    | 103919      |
| Achondroplasia                                              | 15         | Autoimmune polyendocrinopathy type 1                                                       | 3453        |
| Achromatopsia                                               | 49382      | Autoimmune polyendocrinopathy type 2                                                       | 3143        |
| Acrodysostosis                                              | 950        | Autosomal dominant cerebellar ataxia                                                       | 99          |
| Acromegaly                                                  | 963        | Autosomal dominant Charcot-Marie-Tooth disease type 2K                                     | 99944       |
| Acute intermittent porphyria                                | 79276      | Autosomal dominant chorioretinopathy-microcephaly syndrome                                 | 1432        |
| Addison disease                                             | 85138      | Autosomal dominant intellectual disability-craniofacial anomalies-cardiac defects syndrome | 457193      |
| Adenosine monophosphate deaminase deficiency                | 45         | Autosomal dominant non-syndromic intellectual disability                                   | 178469      |
| ADNP syndrome                                               | 404448     | Autosomal dominant spastic paraplegia type 3                                               | 100984      |
| Adult-onset cervical dystonia                               | 420492     | Autosomal dominant spastic paraplegia type 4                                               | 100985      |
| Adult-onset foveomacular vitelliform dystrophy              | 99000      | Autosomal erythropoietic protoporphyria                                                    | 79278       |
| Adult-onset Still disease                                   | 829        | Autosomal recessive cerebellar ataxia                                                      | 1172        |
| Aicardi syndrome                                            | 50         | Autosomal recessive cerebelloparenchymal disorder type 3                                   | 1170        |
| Alagille syndrome due to a JAG1 point mutation              | 261619     | Autosomal recessive congenital ichthyosis                                                  | 281097      |
| Alkaptonuria                                                | 56         | Autosomal recessive spastic paraplegia type 76                                             | 488594      |
| Allan-Herndon-Dudley syndrome                               | 59         | Bardet-Biedl syndrome                                                                      | 110         |
| Alopecia universalis                                        | 701        | Becker muscular dystrophy                                                                  | 98895       |
| Alpha-1-antitrypsin deficiency                              | 60         | Behçet disease                                                                             | 117         |
| Alpha-sarcoglycan-related limb-girdle muscular dystrophy R3 | 62         | Benign concentric annular macular dystrophy                                                | 251287      |
| Alström syndrome                                            | 64         | Bernard-Soulier syndrome                                                                   | 274         |
| Alternating hemiplegia of childhood                         | 2131       | Best vitelliform macular dystrophy                                                         | 1243        |
| American trypanosomiasis                                    | 3386       | Bilateral generalized polymicrogyria                                                       | 208447      |
| Amyotrophic lateral sclerosis                               | 803        | Bilateral striopallidodentate calcinosis                                                   | 1980        |
| Angelman syndrome                                           | 72         | Bipartite talus                                                                            | 364198      |
| Anorectal malformation                                      | 96346      | Blackfan-Diamond anemia                                                                    | 124         |
| Antiphospholipid syndrome                                   | 80         | Bohring-Opitz syndrome                                                                     | 97297       |
| Antisynthetase syndrome                                     | 81         |                                                                                            |             |
| Arachnoid cyst                                              | 2356       |                                                                                            |             |
| Arachnoiditis                                               | 137817     |                                                                                            |             |
| Arnold-Chiari malformation type I                           | 268882     |                                                                                            |             |

|                                                                                                                           |        |
|---------------------------------------------------------------------------------------------------------------------------|--------|
| Borjeson-Forssman-Lehmann syndrome                                                                                        | 127    |
| Brittle cornea syndrome                                                                                                   | 90354  |
| Bronchiolitis obliterans with obstructive pulmonary disease                                                               | 1303   |
| Brown-Vialetto-van Laere syndrome type II                                                                                 | 97229  |
| Brugada syndrome                                                                                                          | 130    |
| Bullous pemphigoid                                                                                                        | 703    |
| Calpain-3-related limb-girdle muscular dystrophy R1                                                                       | 267    |
| Cardiofaciocutaneous syndrome                                                                                             | 1340   |
| Carnitine palmitoyltransferase II deficiency                                                                              | 157    |
| Caroli disease                                                                                                            | 53035  |
| Catecholaminergic polymorphic ventricular tachycardia                                                                     | 3286   |
| Caudal regression sequence                                                                                                | 3027   |
| Central areolar choroidal dystrophy                                                                                       | 75377  |
| Central diabetes insipidus                                                                                                | 178029 |
| Cerebral autosomal dominant arteriopathy-subcortical infarcts-leukoencephalopathy                                         | 136    |
| Charcot-Marie-Tooth disease type 1A                                                                                       | 101081 |
| Charcot-Marie-Tooth disease/Hereditary motor and sensory neuropathy                                                       | 166    |
| CHD3-related developmental delay-speech delay-intellectual disability-abnormalities of vision-facial dysmorphism syndrome | 599082 |
| Childhood disintegrative disorder                                                                                         | 168782 |
| Cholesteryl ester storage disease                                                                                         | 75234  |
| Choroideremia                                                                                                             | 180    |
| Chronic inflammatory demyelinating polyneuropathy                                                                         | 2932   |
| Clark-Baraitser syndrome                                                                                                  | 600731 |
| Classic Bartter syndrome                                                                                                  | 93605  |
| Classic galactosemia                                                                                                      | 79239  |
| Classic glucose transporter type 1 deficiency syndrome                                                                    | 71277  |
| Classic mycosis fungoides                                                                                                 | 2584   |
| Clippers                                                                                                                  | 284448 |
| Coffin-Siris syndrome                                                                                                     | 1465   |
| Cogan syndrome                                                                                                            | 1467   |
| Cohen syndrome                                                                                                            | 193    |
| Combined dystonia                                                                                                         | 98203  |
| Combined oxidative phosphorylation defect type 23                                                                         | 444013 |
| Combined pituitary hormone deficiencies, genetic forms                                                                    | 95494  |
| Common variable immunodeficiency                                                                                          | 1572   |
| Complex regional pain syndrome type 1                                                                                     | 99995  |
| Complex regional pain syndrome type 2                                                                                     | 99994  |

|                                                                            |        |
|----------------------------------------------------------------------------|--------|
| Cone rod dystrophy                                                         | 1872   |
| Congenital erythropoietic porphyria                                        | 79277  |
| Congenital factor VII deficiency                                           | 327    |
| Congenital factor XI deficiency                                            | 329    |
| Congenital fiber-type disproportion myopathy                               | 2020   |
| Congenital fibrosis of extraocular muscles                                 | 45358  |
| Congenital glaucoma                                                        | 98976  |
| Congenital hypothyroidism                                                  | 442    |
| Congenital limbs-face contractures-hypotonia-developmental delay syndrome  | 562528 |
| Congenital pulmonary lymphangiectasia                                      | 2414   |
| Constitutional megaloblastic anemia due to vitamin B12 metabolism disorder | 98396  |
| Cornelia de Lange syndrome                                                 | 199    |
| Cowden syndrome                                                            | 201    |
| CREST syndrome                                                             | 90290  |
| Crisponi syndrome                                                          | 1545   |
| Cushing disease                                                            | 96253  |
| Cutaneous mastocytosis                                                     | 66646  |
| Cystic fibrosis                                                            | 586    |
| Dent disease                                                               | 1652   |
| Dermatomyositis                                                            | 221    |
| Desmoid tumor                                                              | 873    |
| Diffuse cutaneous mastocytosis                                             | 79456  |
| Diffuse neonatal hemangiomatosis                                           | 2123   |
| Disorder of fructose metabolism                                            | 308463 |
| Disorder of urea cycle metabolism and ammonia detoxification               | 79167  |
| Distal monosomy 12p                                                        | 280325 |
| Distal myotilinopathy                                                      | 98911  |
| Distal renal tubular acidosis                                              | 18     |
| Distal spinal muscular atrophy                                             | 53739  |
| Dravet syndrome                                                            | 33069  |
| Duane retraction syndrome                                                  | 233    |
| Duchenne muscular dystrophy                                                | 98896  |
| Dural sinus malformation                                                   | 97339  |
| Dystrophic epidermolysis bullosa                                           | 303    |
| Early infantile epileptic encephalopathy                                   | 1934   |
| Early-onset generalized limb-onset dystonia                                | 256    |
| Early-onset non-syndromic cataract                                         | 91492  |
| Ectrodactyly with and without other manifestations                         | 498477 |
| Ehlers-Danlos syndrome                                                     | 98249  |
| Eosinophilic esophagitis                                                   | 73247  |

|                                                                                                           |        |
|-----------------------------------------------------------------------------------------------------------|--------|
| Eosinophilic fasciitis                                                                                    | 3165   |
| Eosinophilic gastroenteritis                                                                              | 2070   |
| Eosinophilic granulomatosis with polyangiitis                                                             | 183    |
| Epidermolysis bullosa simplex                                                                             | 304    |
| Epithelioid hemangioendothelioma                                                                          | 157791 |
| Esophageal atresia                                                                                        | 1199   |
| Essential iris atrophy                                                                                    | 98981  |
| Essential thrombocythemia                                                                                 | 3318   |
| F12-related hereditary angioedema with normal C1Inh                                                       | 100054 |
| Fabry disease                                                                                             | 324    |
| Facioscapulohumeral dystrophy                                                                             | 269    |
| Familial drusen                                                                                           | 75376  |
| Familial exudative vitreoretinopathy                                                                      | 891    |
| Familial Mediterranean fever                                                                              | 342    |
| Familial paroxysmal ataxia                                                                                | 97     |
| Febrile infection-related epilepsy syndrome                                                               | 163703 |
| Female restricted epilepsy with intellectual disability                                                   | 101039 |
| Fibrodysplasia ossificans progressiva                                                                     | 337    |
| Focal, segmental or multifocal dystonia                                                                   | 1866   |
| FOXG1 syndrome                                                                                            | 561854 |
| Fragile X syndrome                                                                                        | 908    |
| Friedreich ataxia                                                                                         | 95     |
| Gastrointestinal stromal tumor                                                                            | 44890  |
| Gaucher disease type 1                                                                                    | 77259  |
| Gitelman syndrome                                                                                         | 358    |
| Global developmental delay-neuro-ophthalmological abnormalities-seizures-intellectual disability syndrome | 488613 |
| Glutaryl-CoA dehydrogenase deficiency                                                                     | 25     |
| Glycogen storage disease due to muscle glycogen phosphorylase deficiency                                  | 368    |
| GNAO1-related developmental delay-seizures-movement disorder spectrum                                     | 592564 |
| Goldenhar syndrome                                                                                        | 374    |
| Gorlin syndrome                                                                                           | 377    |
| Granulomatosis with polyangiitis                                                                          | 900    |
| GRIN2B-related developmental delay, intellectual disability and autism spectrum disorder                  | 589547 |
| Gyrate atrophy of choroid and retina                                                                      | 414    |
| Hemolytic anemia due to red cell pyruvate kinase deficiency                                               | 766    |
| Hereditary angioedema type 1                                                                              | 100050 |
| Hereditary angioedema type 2                                                                              | 100051 |

|                                                                                     |        |
|-------------------------------------------------------------------------------------|--------|
| Hereditary fructose intolerance                                                     | 469    |
| Hereditary hemorrhagic telangiectasia                                               | 774    |
| Hereditary motor and sensory neuropathy type 5                                      | 64751  |
| Hereditary neuropathy with liability to pressure palsies                            | 640    |
| Hereditary spastic paraplegia                                                       | 320335 |
| Hidrotic ectodermal dysplasia                                                       | 189    |
| Hinman syndrome                                                                     | 84085  |
| Hirschsprung disease                                                                | 388    |
| Holt-Oram syndrome                                                                  | 392    |
| Horizontal gaze palsy with progressive scoliosis                                    | 2744   |
| Huntington disease                                                                  | 399    |
| Hyperlipoproteinemia type 1                                                         | 411    |
| Hypermobile Ehlers-Danlos syndrome                                                  | 285    |
| Hypohidrotic ectodermal dysplasia                                                   | 238468 |
| Hypoxanthine guanine phosphoribosyltransferase partial deficiency                   | 79233  |
| Ichthyosis                                                                          | 79354  |
| Idiopathic achalasia                                                                | 930    |
| Idiopathic hypersomnia                                                              | 33208  |
| Idiopathic intracranial hypertension                                                | 238624 |
| Idiopathic multicentric Castleman disease                                           | 570431 |
| Idiopathic pleuroparenchymal fibroelastosis                                         | 494428 |
| Idiopathic pulmonary arterial hypertension                                          | 275766 |
| Idiopathic pulmonary fibrosis                                                       | 2032   |
| IgG4-related retroperitoneal fibrosis                                               | 49041  |
| Immune thrombocytopenia                                                             | 3002   |
| Inclusion body myopathy with Paget disease of bone and frontotemporal dementia      | 52430  |
| Indolent systemic mastocytosis                                                      | 98848  |
| Intellectual disability syndrome due to a DYRK1A point mutation                     | 464311 |
| Intellectual disability-cataracts-calcified pinnae-myopathy syndrome                | 3042   |
| Intellectual disability-craniofacial dysmorphism-cryptorchidism syndrome            | 329224 |
| Intellectual disability-expressive aphasia-facial dysmorphism syndrome              | 436151 |
| Intellectual disability-facial dysmorphism syndrome due to SETD5 haploinsufficiency | 404440 |
| Intellectual disability-macrocephaly-hypotonia-behavioral abnormalities syndrome    | 457279 |
| Interstitial cystitis                                                               | 37202  |
| Inverted duplicated chromosome 15 syndrome                                          | 3306   |

|                                                                                   |        |
|-----------------------------------------------------------------------------------|--------|
| IRF2BPL-related regressive neurodevelopmental disorder-dystonia-seizures syndrome | 597623 |
| Isolated aniridia                                                                 | 250923 |
| Isolated biliary atresia                                                          | 30391  |
| Isolated complex I deficiency                                                     | 2609   |
| Isolated complex III deficiency                                                   | 1460   |
| Isolated congenital hypogonadotropic hypogonadism                                 | 238666 |
| Isolated corpus callosum agenesis                                                 | 200    |
| Isolated cytochrome C oxidase deficiency                                          | 254905 |
| Isolated Klippel-Feil syndrome                                                    | 2345   |
| Isolated optic neuritis                                                           | 499096 |
| Isolated scaphocephaly                                                            | 35093  |
| Juvenile dermatomyositis                                                          | 93672  |
| Juvenile overlap myositis                                                         | 329894 |
| Juvenile xanthogranuloma                                                          | 158000 |
| Kabuki syndrome                                                                   | 2322   |
| KBG syndrome                                                                      | 2332   |
| KCNQ2-related epileptic encephalopathy                                            | 439218 |
| Kennedy disease                                                                   | 481    |
| Kleine-Levin syndrome                                                             | 33543  |
| Klippel-Trénaunay syndrome                                                        | 90308  |
| Koolen-De Vries syndrome                                                          | 96169  |
| Lamb-Shaffer syndrome                                                             | 530983 |
| Laminin subunit alpha 2-related congenital muscular dystrophy                     | 258    |
| Langerhans cell histiocytosis                                                     | 389    |
| Larsen syndrome                                                                   | 503    |
| Leber congenital amaurosis                                                        | 65     |
| Leber hereditary optic neuropathy                                                 | 104    |
| Legg-Calvé-Perthes disease                                                        | 2380   |
| Leigh syndrome                                                                    | 506    |
| Limb-girdle muscular dystrophy                                                    | 263    |
| Localized dystrophic epidermolysis bullosa, acral form                            | 158673 |
| Localized scleroderma                                                             | 90289  |
| Lymphangioliomyomatosis                                                           | 538    |
| Lynch syndrome                                                                    | 144    |
| Marfan syndrome                                                                   | 558    |
| McLeod neuroacanthocytosis syndrome                                               | 59306  |
| Medium chain acyl-CoA dehydrogenase deficiency                                    | 42     |
| Megalencephalic leukoencephalopathy with subcortical cysts                        | 2478   |
| Megalencephaly                                                                    | 2477   |

|                                                                                       |        |
|---------------------------------------------------------------------------------------|--------|
| Megalencephaly-capillary malformation-polymicrogyria syndrome                         | 60040  |
| Melkersson-Rosenthal syndrome                                                         | 2483   |
| Melorheostosis                                                                        | 2485   |
| Menke-Hennekam syndrome                                                               | 592574 |
| Mesial temporal lobe epilepsy with hippocampal sclerosis                              | 99701  |
| Metaphyseal chondrodysplasia, Jansen type                                             | 33067  |
| Methylmalonic acidemia with homocystinuria, type cblC                                 | 79282  |
| Microcornea-posterior megalolenticulus-persistent fetal vasculature-coloboma syndrome | 231736 |
| Mitochondrial myopathy                                                                | 206966 |
| Mitochondrial myopathy-lactic acidosis-deafness syndrome                              | 2597   |
| Mixed connective tissue disease                                                       | 809    |
| Monoclonal mast cell activation syndrome                                              | 529468 |
| Monomelic amyotrophy                                                                  | 65684  |
| Monosomy 18p                                                                          | 1598   |
| Monosomy 22q13.3                                                                      | 48652  |
| Monosomy 5p                                                                           | 281    |
| Monosomy 9p                                                                           | 261112 |
| Motor neuron disease                                                                  | 98503  |
| Mucopolysaccharidosis type 2                                                          | 580    |
| Mucopolysaccharidosis type 3                                                          | 581    |
| Multiminicore myopathy                                                                | 598    |
| Multiple endocrine neoplasia type 2 <sup>a</sup>                                      | 247698 |
| Multiple endocrine neoplasia type 2B                                                  | 247709 |
| Multiple myeloma                                                                      | 29073  |
| Multiple osteochondromas                                                              | 321    |
| Muscular dystrophy                                                                    | 98473  |
| Myasthenia gravis                                                                     | 589    |
| Myelomeningocele                                                                      | 93969  |
| Myhre syndrome                                                                        | 2588   |
| Myoclonus-dystonia syndrome                                                           | 36899  |
| Myopic macular degeneration                                                           | 178493 |
| Narcolepsy type 1                                                                     | 2073   |
| Narcolepsy type 1                                                                     | 2073   |
| Narcolepsy type 2                                                                     | 83465  |
| Neuralgic amyotrophy                                                                  | 2901   |
| Neuroacanthocytosis                                                                   | 263440 |
| Neurofibromatosis type 1                                                              | 636    |
| Neurofibromatosis type 2                                                              | 637    |
| Neuromyelitis optica spectrum disorder                                                | 71211  |
| Nicolaidis-Baraitser syndrome                                                         | 3051   |

|                                                                                                                       |        |
|-----------------------------------------------------------------------------------------------------------------------|--------|
| Niemann-Pick disease type B                                                                                           | 77293  |
| Non-acquired panhypopituitarism                                                                                       | 90695  |
| Non-specific early-onset epileptic encephalopathy                                                                     | 442835 |
| Noonan syndrome                                                                                                       | 648    |
| Noonan syndrome with multiple lentigines                                                                              | 500    |
| Noonan syndrome-like disorder with loose anagen hair                                                                  | 2701   |
| NRXN1-related severe neurodevelopmental disorder-motor stereotypies-chronic constipation-sleep-wake cycle disturbance | 600663 |
| Oculopharyngeal muscular dystrophy                                                                                    | 270    |
| Oligodontia                                                                                                           | 99798  |
| Ollier disease                                                                                                        | 296    |
| Opsoclonus-myoclonus syndrome                                                                                         | 1183   |
| Oromandibular dystonia                                                                                                | 93958  |
| Osteochondritis dissecans                                                                                             | 2764   |
| Osteogenesis imperfecta                                                                                               | 666    |
| Osteogenesis imperfecta type 4                                                                                        | 216820 |
| Overlapping connective tissue disease                                                                                 | 251312 |
| Paroxysmal nocturnal hemoglobinuria                                                                                   | 447    |
| Partial deletion of the long arm of chromosome 18                                                                     | 262146 |
| Partial deletion of the long arm of chromosome 2                                                                      | 262010 |
| Partial trisomy/tetrasomy of the short arm of chromosome 12                                                           | 262658 |
| Pelizaeus-Merzbacher disease                                                                                          | 702    |
| Pemphigus vulgaris                                                                                                    | 704    |
| Perineural cyst                                                                                                       | 65250  |
| Peroxisome biogenesis disorder                                                                                        | 79189  |
| Peutz-Jeghers syndrome                                                                                                | 2869   |
| Phenylketonuria                                                                                                       | 716    |
| Pigmented villonodular synovitis                                                                                      | 66627  |
| Pitt-Hopkins syndrome                                                                                                 | 2896   |
| PMM2-CDG                                                                                                              | 79318  |
| Poland syndrome                                                                                                       | 2911   |
| Polyarteritis nodosa                                                                                                  | 767    |
| Polycythemia vera                                                                                                     | 729    |
| Porphyria variegata                                                                                                   | 79473  |
| Postpoliomyelitis syndrome                                                                                            | 2942   |
| Postural orthostatic tachycardia syndrome due to NET deficiency                                                       | 443236 |
| Potocki-Shaffer syndrome                                                                                              | 52022  |
| Prader-Willi syndrome                                                                                                 | 739    |
| Primary ciliary dyskinesia, Kartagener type                                                                           | 98861  |

|                                                                                              |        |
|----------------------------------------------------------------------------------------------|--------|
| Primary erythromelalgia                                                                      | 90026  |
| Primary hypereosinophilic syndrome                                                           | 314950 |
| Primary progressive aphasia                                                                  | 95432  |
| Progressive cone dystrophy                                                                   | 1871   |
| Progressive hemifacial atrophy                                                               | 1214   |
| Prolidase deficiency                                                                         | 742    |
| Proximal 16p11.2 microdeletion syndrome                                                      | 261197 |
| Pseudoachondroplasia                                                                         | 750    |
| Pseudohypoparathyroidism                                                                     | 97593  |
| Pseudohypoparathyroidism type 1A                                                             | 79443  |
| Pseudoxanthoma elasticum                                                                     | 758    |
| Pudendal neuralgia                                                                           | 60039  |
| Pulmonary alveolar microlithiasis                                                            | 60025  |
| Pulmonary arterial hypertension associated with another disease                              | 275791 |
| Punctate palmoplantar keratoderma                                                            | 307967 |
| Radial hemimelia                                                                             | 93321  |
| Rapid-onset dystonia-parkinsonism                                                            | 71517  |
| Rare dystonia                                                                                | 68363  |
| Rare genetic dystonia                                                                        | 391799 |
| Rare hereditary ataxia                                                                       | 183518 |
| Rare inflammatory bowel disease                                                              | 104012 |
| Rare pulmonary hypertension                                                                  | 71198  |
| Recessive X-linked ichthyosis                                                                | 461    |
| Renal nutcracker syndrome                                                                    | 71273  |
| Reticular dysgenesis                                                                         | 335    |
| Retinitis pigmentosa                                                                         | 791    |
| Retinoblastoma                                                                               | 790    |
| Rett syndrome                                                                                | 778    |
| Rheumatoid factor-negative polyarticular juvenile idiopathic arthritis                       | 85408  |
| Rubinstein-Taybi syndrome                                                                    | 783    |
| SAPHO syndrome                                                                               | 793    |
| Sarcoidosis                                                                                  | 797    |
| Selective IgM deficiency                                                                     | 331235 |
| Semicircular canal dehiscence syndrome                                                       | 420402 |
| Serpiginous choroiditis                                                                      | 35686  |
| Severe intellectual disability and progressive spastic paraplegia                            | 280763 |
| Severe intellectual disability-poor language-strabismus-grimacing face-long fingers syndrome | 363686 |
| Severe intellectual disability-progressive spastic diplegia syndrome                         | 404473 |
| Shwachman-Diamond syndrome                                                                   | 811    |
| Sjögren-Larsson syndrome                                                                     | 816    |

|                                                                          |                  |
|--------------------------------------------------------------------------|------------------|
| Smith-Magenis syndrome                                                   | 819              |
| Sotos syndrome                                                           | 821              |
| Spinocerebellar ataxia type 3                                            | 98757            |
| Spinocerebellar ataxia type 38                                           | 423296           |
| Sporadic adult-onset ataxia of unknown etiology                          | 247234           |
| Sprengel deformity                                                       | 3181             |
| Stargardt disease                                                        | 827              |
| Steinert myotonic dystrophy                                              | 273              |
| Steroid-responsive encephalopathy associated with autoimmune thyroiditis | 83601            |
| Stevens-Johnson syndrome                                                 | 36426            |
| Stiff person spectrum disorder                                           | 3198             |
| Stromal corneal dystrophy                                                | 98626            |
| Stromal corneal dystrophy                                                | 98676            |
| Sturge-Weber syndrome                                                    | 3205             |
| STXBP1-related encephalopathy                                            | 599373           |
| Succinic semialdehyde dehydrogenase deficiency                           | 22               |
| Sympathetic ophthalmia                                                   | 79098            |
| Syndrome with corpus callosum agenesis/dysgenesis as a major feature     | 199639           |
| Syndromic genetic keratoconus/Syndromic keratoconus                      | 522564/<br>98623 |
| SYNGAP1-related developmental and epileptic encephalopathy               | 544254           |
| Syringomyelia                                                            | 3280             |
| Systemic capillary leak syndrome                                         | 188              |
| Systemic lupus erythematosus                                             | 536              |
| Systemic mastocytosis                                                    | 2467             |
| Systemic sclerosis                                                       | 90291            |
| Systemic-onset juvenile idiopathic arthritis                             | 85414            |
| Tetrasomy 9p                                                             | 3310             |
| Thalidomide embryopathy                                                  | 3312             |

|                                                                                   |        |
|-----------------------------------------------------------------------------------|--------|
| Thomsen and Becker disease                                                        | 614    |
| Thoracic outlet syndrome                                                          | 97330  |
| Toxic oil syndrome                                                                | 227972 |
| Treacher-Collins syndrome                                                         | 861    |
| Trigeminal neuralgia                                                              | 221091 |
| Trisomy 18                                                                        | 3380   |
| Trisomy X                                                                         | 3375   |
| Tuberous sclerosis complex                                                        | 805    |
| Tumor necrosis factor receptor 1 associated periodic syndrome                     | 32960  |
| Turner syndrome                                                                   | 881    |
| Unclassified autoinflammatory syndrome                                            | 324936 |
| Usher syndrome                                                                    | 886    |
| Usher syndrome type 1                                                             | 231169 |
| Usher syndrome type 2                                                             | 231178 |
| Uveal melanoma                                                                    | 39044  |
| VACTERL/VATER association                                                         | 887    |
| Vascular Ehlers-Danlos syndrome                                                   | 286    |
| Vestibular schwannoma                                                             | 252175 |
| Von Willebrand disease type 1                                                     | 166078 |
| WAGR syndrome                                                                     | 893    |
| Walker-Warburg syndrome                                                           | 899    |
| White matter hypoplasia-corpor callosum agenesis-intellectual disability syndrome | 3207   |
| Williams syndrome                                                                 | 904    |
| Wilson disease                                                                    | 905    |
| Wolf-Hirschhorn syndrome                                                          | 280    |
| X-linked adrenoleukodystrophy                                                     | 43     |
| X-linked Charcot-Marie-Tooth disease                                              | 64747  |
| X-linked creatine transporter deficiency                                          | 52503  |
| X-linked non-syndromic intellectual disability                                    | 777    |
| Xeroderma pigmentosum                                                             | 910    |
